# Supplementary material for: Endothelial cells are not productively infected by SARS‐CoV‐2
Source: PubMed Central journal article supplement (PMC8542944; doi:10.1002/cti2.1350), 2021-10-24
Supplement: CTI2-10-e1350-s001.pdf [file CTI2-10-e1350-s001.pdf]

**Supplementary table 1: Patient information**

| <b>Patient ID</b> | <b>Diagnosis</b> | <b>Sex</b> | <b>Age</b> | <b>Co-morbidities</b>                                                                                                                                  | <b>Histology</b>                       | <b>Computed tomography chest at admission</b>                                                                                                  | <b>Length of stay on mechanical ventilation</b> | <b>Admission to death</b> |
|-------------------|------------------|------------|------------|--------------------------------------------------------------------------------------------------------------------------------------------------------|----------------------------------------|------------------------------------------------------------------------------------------------------------------------------------------------|-------------------------------------------------|---------------------------|
| PT1*              | COVID-19         | F          | 87         | Systemic Arterial Hypertension, Dyslipidemia, Hypothyroidism, Senile dementia                                                                          | Acute phase DAD                        | Diffuse and bilateral “opacities with ground-glass attenuation”, thickening of the pulmonary septum, suggestive of viral pulmonary infection   | 8 days                                          | 8 days                    |
| PT2               | COVID-19         | M          | 53         | Class II obesity                                                                                                                                       | Acute phase DAD                        | Diffuse and bilateral “opacities with ground-glass attenuation”, suggestive of viral pulmonary infection                                       | 8 days                                          | 13 days                   |
| PT3*              | COVID-19         | F          | 85         | Systemic Arterial Hypertension, Brain Stroke, Vascular Dementia                                                                                        | Acute phase DAD                        | Image of “opacities with ground-glass attenuation” upper left lobe, suggestive of viral pulmonary infection, and small volume pleural effusion | 0 days                                          | 23 days                   |
| PT4               | COVID-19         | M          | 73         | Type 2 Diabetes Mellitus, Chronic Kidney Disease Dialysis, Atrial Fibrillation, Coronary Disease, Heart Failure, Peripheral Obstructive Artery Disease | Reactive Type 2 pneumocyte hyperplasia | Diffuse and bilateral “opacities with ground-glass attenuation”, suggestive of viral pulmonary infection                                       | 10 days                                         | 38 days                   |
| PT6               | COVID-19         | M          | 80         | Systemic Arterial Hypertension, Coronary Disease, Heart Failure, Class III obesity                                                                     | Reactive Type 2 pneumocyte hyperplasia | Diffuse and bilateral “opacities with ground-glass attenuation”, suggestive of viral pulmonary infection                                       | 21 days                                         | 23 days                   |

|      |          |     |     |                                                                                         |                                        |                                                                                                                                                             |        |        |
|------|----------|-----|-----|-----------------------------------------------------------------------------------------|----------------------------------------|-------------------------------------------------------------------------------------------------------------------------------------------------------------|--------|--------|
| PT7  | COVID-19 | M   | 81  | Systemic Arterial Hypertension, Chronic Kidney Disease Dialysis, Brain Stroke           | Reactive Type 2 pneumocyte hyperplasia | Diffuse and bilateral "opacities with ground-glass attenuation", suggestive of viral pulmonary infection                                                    | 8 days | 8 days |
| PT8  | COVID-19 | N/A | N/A | N/A                                                                                     | Organising pneumonia                   | N/A                                                                                                                                                         | N/A    | N/A    |
| PT9  | COVID-19 | M   | 86  | Prostate cancer, Abdominal Aortic Aneurysm, Giant Cells Arteritis                       | Organising pneumonia                   | Peripheral, multifocal and bilateral "opacities with ground-glass attenuation", thickening of the pulmonary septum, suggestive of viral pulmonary infection | 3 days | N/A    |
| PT10 | COVID-19 | M   | 46  | Dyslipidemia                                                                            | Organising pneumonia                   | Peripheral, multifocal and bilateral "opacities with ground-glass attenuation", suggestive of viral pulmonary infection                                     | 5 days | N/A    |
| PT11 | COVID-19 | F   | 93  | Type 2 Diabetes Mellitus, Systemic Arterial Hypertension, Dyslipidemia, Senile dementia | Acute phase DAD                        | Diffuse and bilateral "opacities with ground-glass attenuation", thickening of the pulmonary septum, suggestive of viral pulmonary infection                | 6 days | N/A    |

\*representative images shown in Supplementary Figure 1b, c derived from this patient

**Supplementary table 2: Primers used in the present study**

| <b>Name</b>               | <b>Sequence (5'-3')</b>   |
|---------------------------|---------------------------|
| SARS-COV2 (MPRO) VIRUS FW | GAGACAGGTGGTTTCTCAATCG    |
| SARS-COV2 (MPRO) VIRUS RV | ACGGCAATTCCAGTTTGAGC      |
| GAPDH FW                  | CGAGATCCCTCCAAAATCAA      |
| GAPDH RV                  | TTCACACCCATGACGAACAT      |
| HPRT FW                   | TCAGGCAGTATAATCCAAAGATGGT |
| HPRT RV                   | AGTCTGGCTTATATCCAACACTTCG |
| ACE2 FW                   | TCACGATTGTTGGGACTCTGC     |
| ACE2 RV                   | TCGCTTCATCTCCCACCACT      |
| NEUROPILIN FW             | TGACCGACCACTCCCAACG       |
| NEUROPILIN RV             | AGAGCCCCAGCCAAATTCACAG    |
| TMPRSS2 FW                | GGAAGTTCATGGGCAGCAAG      |
| TMPRSS2 RV                | AGCGAACACACCGATTCTC       |

# Supplementary Figure 1

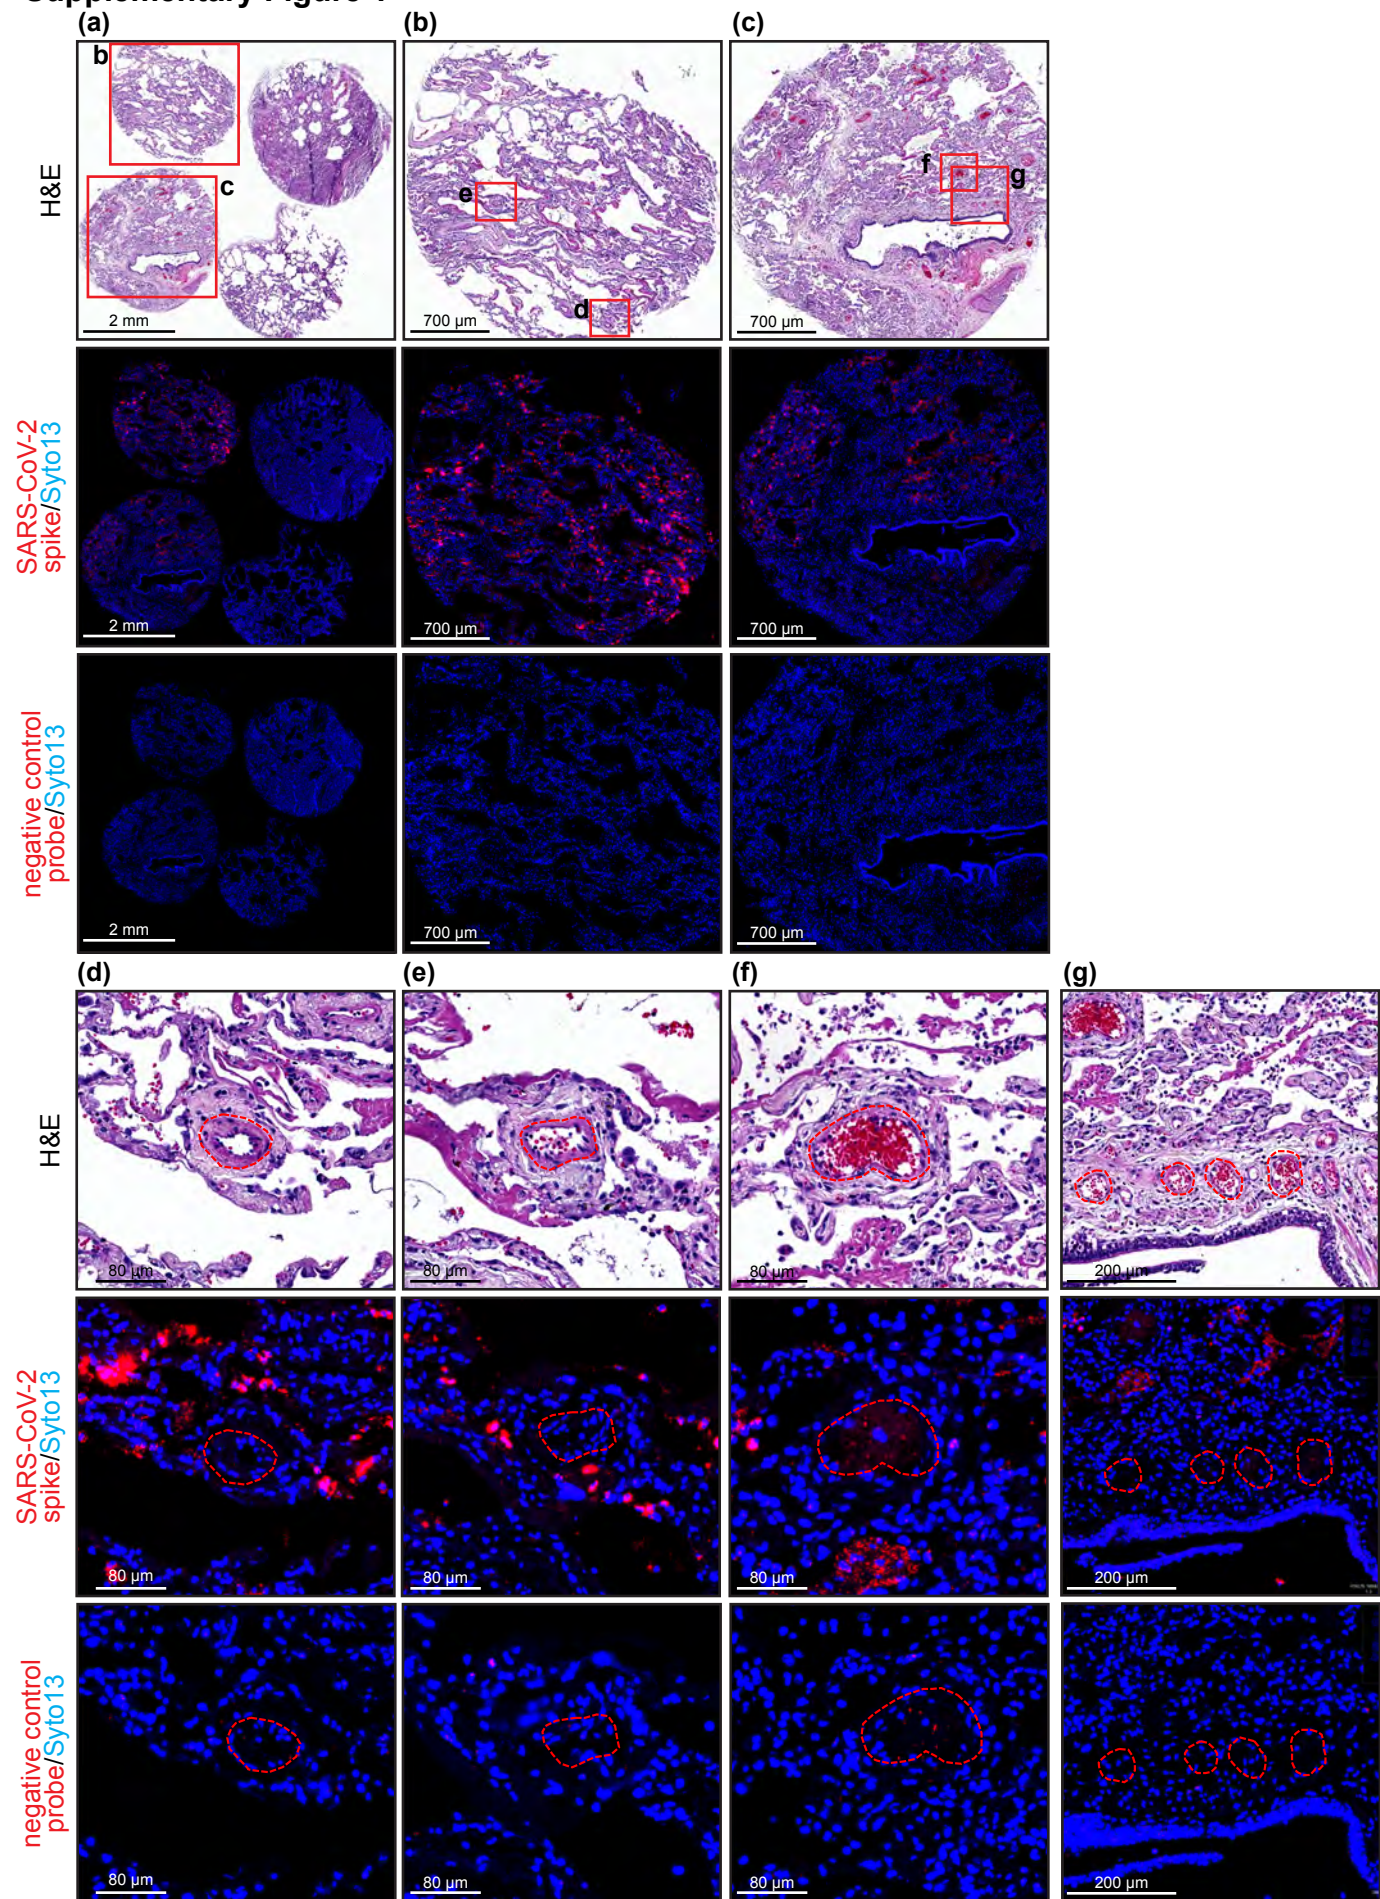

**Supplementary figure 1. *In vivo* sections of lung show endothelial cells are not infected. (a)** Lung tissue from 4 deceased COVID-19 patients was sectioned and stained for Hematoxylin and Eosin (H&E). Consecutive sections were stained using RNAscope probes targeting either SARS-CoV-2 spike mRNA or negative control probe and Syto13 for DNA. **(b-c)** Patients 1 and 2 are positive for SARS-CoV-2 spike mRNA. **(d-g)** Further enlargements of insets show vessels outlined with red dashed line are negative for SARS-CoV-2 spike mRNA in the endothelial layer of the vessels. Negative control probe shows non-specific background staining.

## Supplementary figure 2

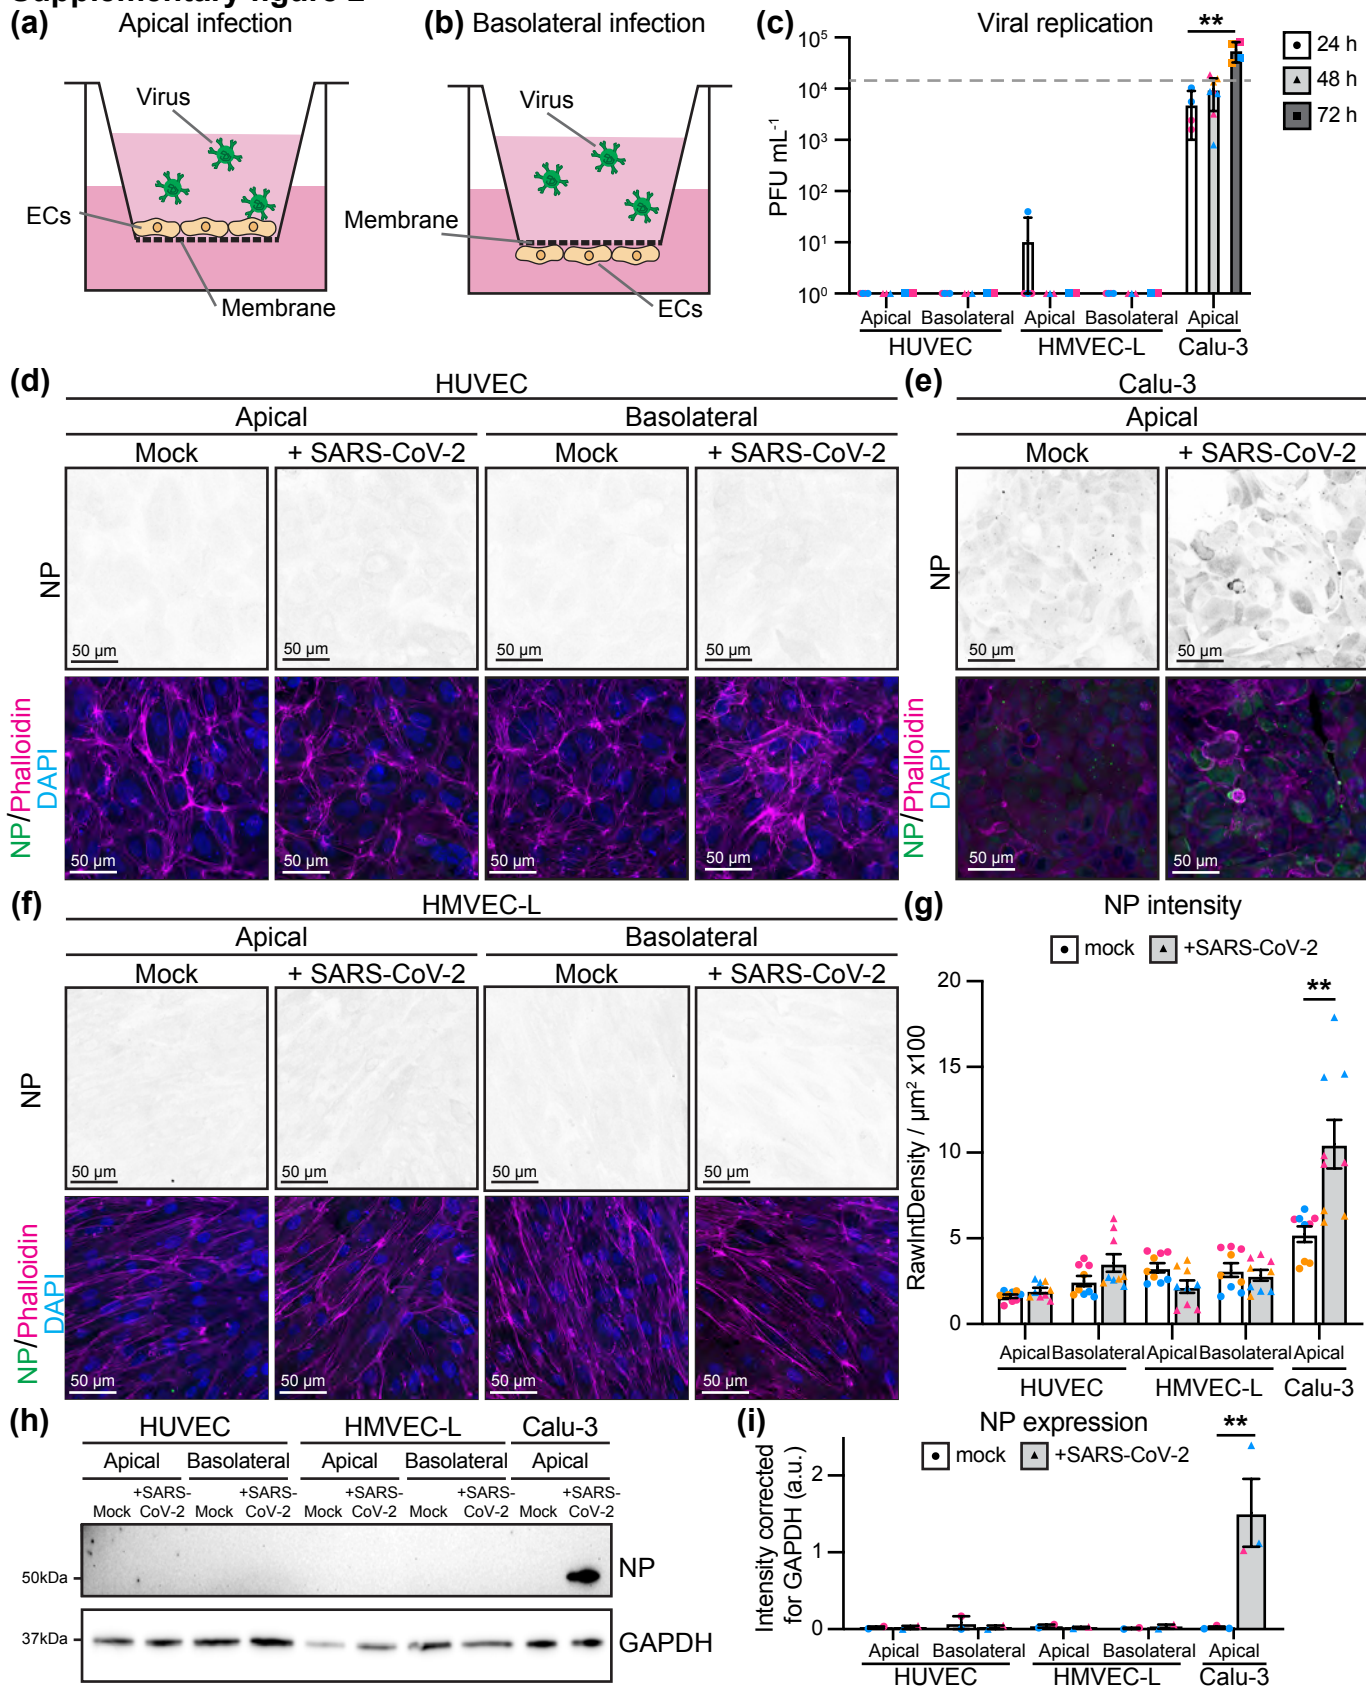

**Supplementary figure 2. Endothelial cells are not productively infected with  $6 \times 10^4$  PFU of SARS-CoV-2.** Schematic of **(a)** apical and **(b)** basolateral infection of cells cultured on transwell membranes. **(c)** Viral replication shown as number of PFU  $\text{ml}^{-1}$  of supernatant from SARS-CoV-2 infected HUVEC, HMVEC-L and Calu-3 cells at 24h, 48h and 72h after infection. Grey dashed line indicates input level.  $n = 2$  (HUVEC and HMVEC-L),  $n = 3$  (Calu-3) independent experiments. Representative immunofluorescent images of **(d)** HUVEC, **(e)** Calu-3 or **(f)** HMVEC-L stained for NP (shown as single channel in top panel) (green), phalloidin (magenta) and DAPI (blue) with mock or SARS-CoV-2 infection from either apical or basolateral side of the cells at 48h after infection. Scalebar  $50 \mu\text{m}$ . **(g)** Quantification of NP staining intensity in HUVEC, HMVEC-L and Calu-3.  $n = 9$  images from 3 independent experiments. **(h)** Western blot analysis showing NP protein levels in HUVEC, HMVEC-L and Calu-3 cells after 48h of infection. **(i)** Quantification of protein levels for NP in HUVEC, HMVEC-L and Calu-3.  $n = 2$  independent experiments. Data are presented as mean  $\pm$  s.e.m. with individual data points indicated and colour coded per independent experimental replicate. Statistical significance was determined using Kruskal Wallis test between 24h and other time points (c) or Mann-Whitney- $U$  test between mock and +SARS-CoV-2 (g,i). \* $P < 0.05$ , \*\* $P < 0.01$ .

### Supplementary figure 3

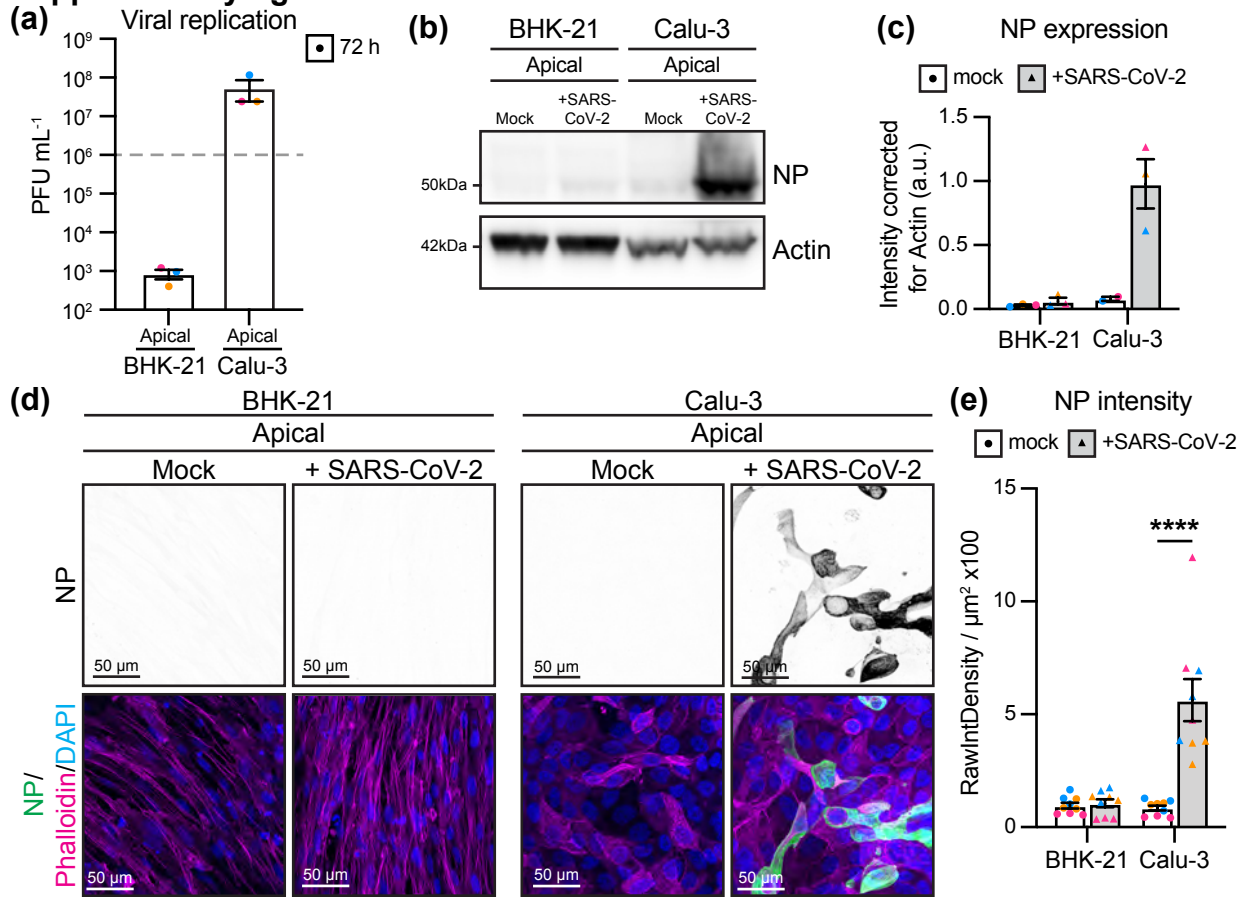

**Supplementary figure 3. Positive and negative controls for infection with  $2 \times 10^6$  PFU of SARS-CoV-2.** (a) Viral replication shown as number of PFU per ml of supernatant from SARS-CoV-2 infected BHK-2 and Calu-3 cells at 72h after infection. Grey dashed line indicates input level.  $n = 3$  independent experiments. (b) Western blot analysis showing NP protein levels in BHK-21 and Calu-3 cells after 72h of apical infection with mock or SARS-CoV-2. (c) Quantification of protein levels for NP in BHK-21 and Calu-3.  $n = 3$  independent experiments. (d) Representative immunofluorescent images of BHK-21 and Calu-3 cells stained for NP (shown as single channel in top panel) (green), phalloidin (magenta) and DAPI (blue) with mock or SARS-CoV-2 infection from apical side of the cells at 72h after infection. Scalebar  $50 \mu\text{m}$ . (e) Quantification of NP staining intensity in BHK-21 and Calu-3.  $n = 9$  images from 3 independent experiments. Data are presented as mean  $\pm$  s.e.m. with individual data points indicated and colour coded per independent experimental replicate. Statistical significance was determined using Mann-Whitney- $U$  test between mock and +SARS-CoV-2 (c, e). \*\*\*\* $P < 0.0001$ .

# Supplementary figure 4

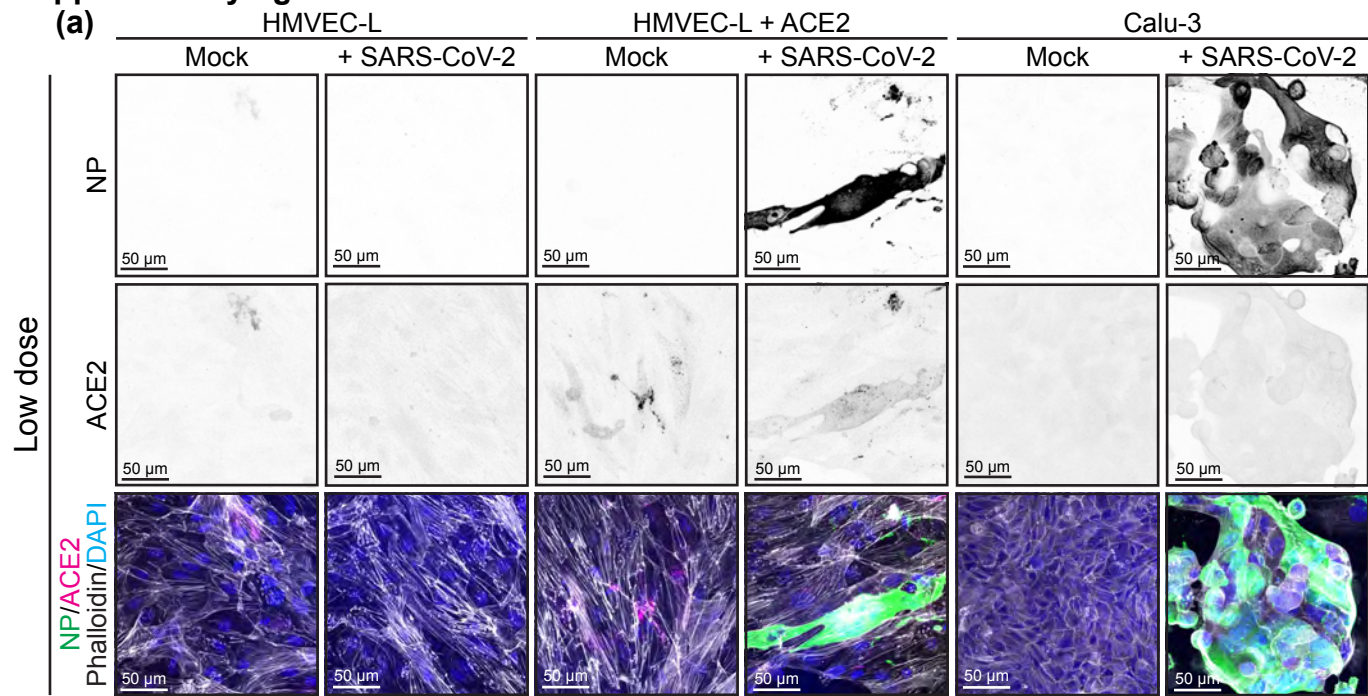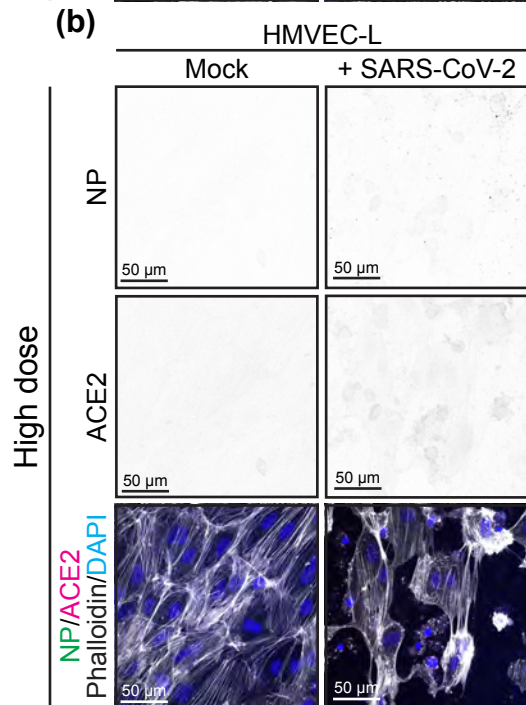

**Supplementary figure 4. ACE2 overexpressing HMVEC-L get infected with SARS-CoV-2.** (a) Representative immunofluorescent images of HMVEC-L, HMVEC-L + ACE2 overexpression and Calu-3 cells stained for NP (shown as single channel in top panel) (green), ACE2 (shown as single channel in middle panel) (magenta), phalloidin (grey) and DAPI (blue) with mock or  $6 \times 10^4$  PFU of SARS-CoV-2 infection from apical side of the cells at 72h after infection. Scalebar  $50 \mu\text{m}$ . (b) Representative immunofluorescent images of HMVEC-L cells stained for NP (shown as single channel in top panel) (green), ACE2 (shown as single channel in middle panel) (magenta), phalloidin (grey) and DAPI (blue) with mock or  $2 \times 10^6$  PFU of SARS-CoV-2 infection from apical side of the cells at 72h after infection. Scalebar  $50 \mu\text{m}$ .

## Supplementary figure 5

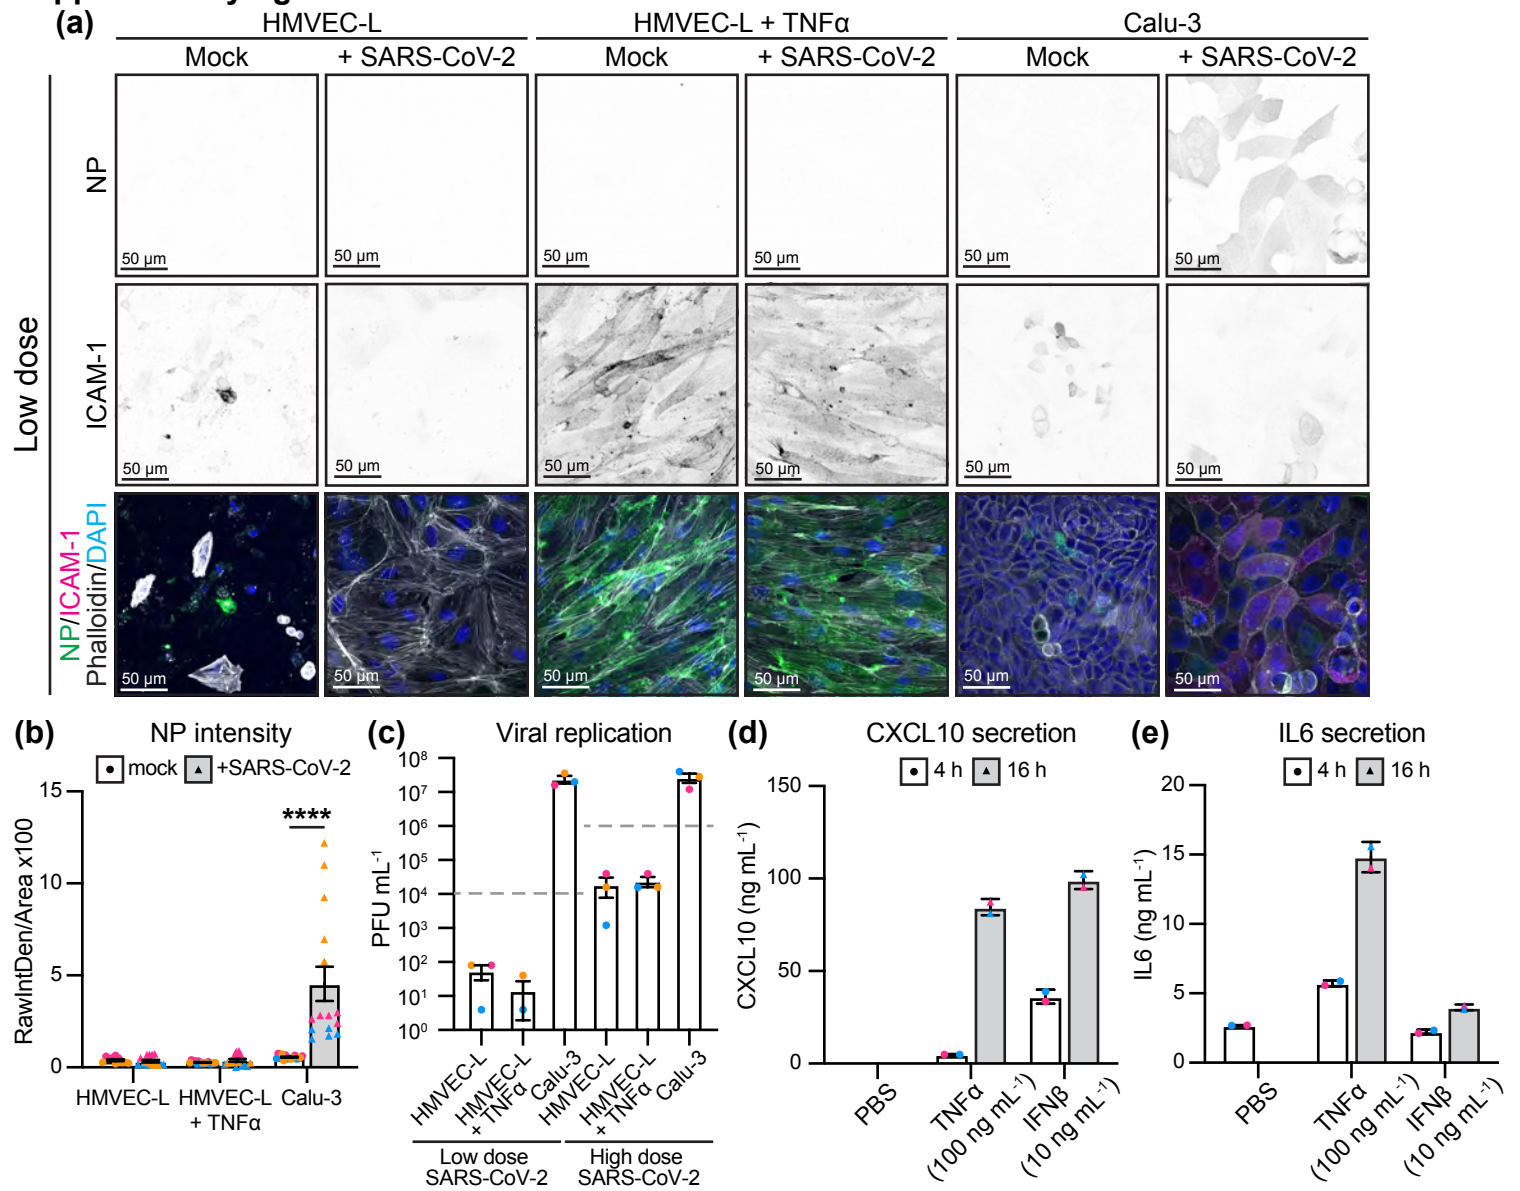

**Supplementary figure 5. Inflamed HMVEC-L do not get infected with SARS-CoV-2 at low dose ( $6 \times 10^4$ ).** (a) Representative immunofluorescent images of HMVEC-L, HMVEC-L + TNF $\alpha$  pre-treatment and Calu-3 cells stained for NP (shown as single channel in top panel) (magenta), ICAM-1 (shown as single channel in middle panel) (green), phalloidin (grey) and DAPI (blue) with mock or  $6 \times 10^4$  PFU of SARS-CoV-2 infection from apical side of the cells at 72h after infection. Scalebar  $50 \mu\text{m}$ . (b) Quantification of NP staining intensity in HMVEC-L, HMVEC-L + TNF $\alpha$  and Calu-3 with SARS-CoV-2 infection.  $n = 15$  images from 3 independent experiments. (c) Viral replication shown as number of PFU  $\text{mL}^{-1}$  of supernatant from SARS-CoV-2 infected HMVEC-L, HMVEC-L + TNF $\alpha$  and Calu-3 cells at 72h after infection with either  $6 \times 10^4$  PFU (low dose) or  $2 \times 10^6$  PFU (high dose). Grey dashed line indicates input levels.  $n = 3$  independent experiments. Maximum secretion levels of (d) CXCL10 and (e) IL6 in the supernatant of HMVEC-L with mock, TNF $\alpha$  or IFN $\beta$  treatment from the apical side of the cells at 4h and 16h after treatment.  $n = 2$  independent experiments. Data are presented as mean  $\pm$  s.e.m. with individual data points indicated and colour coded per independent experimental replicate. Statistical significance was determined using Mann-Whitney- $U$  test between mock and + SARS-CoV-2 (b). \*\*\*\* $P < 0.0001$ .



**Supplementary figure 6**  
**Fig 1c**

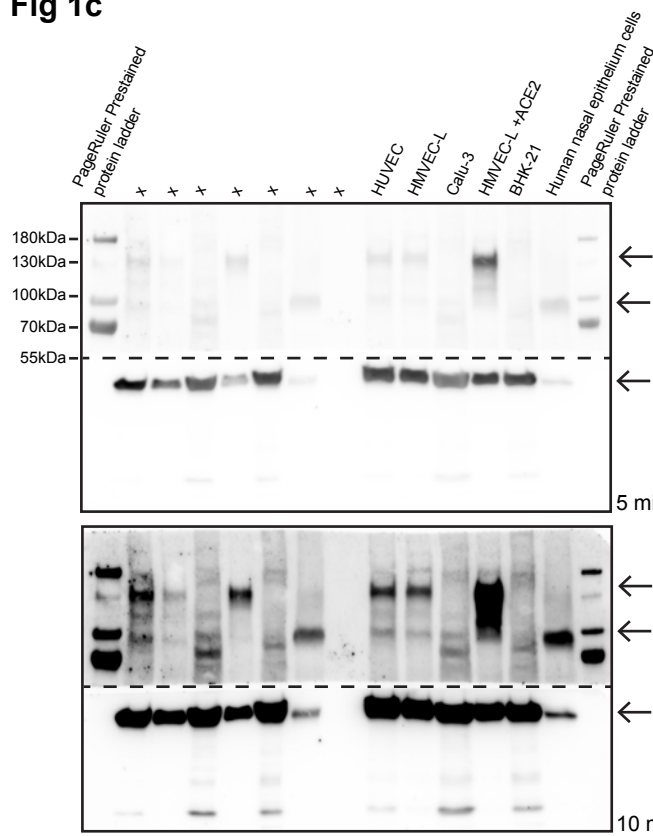

**Fig 2d**

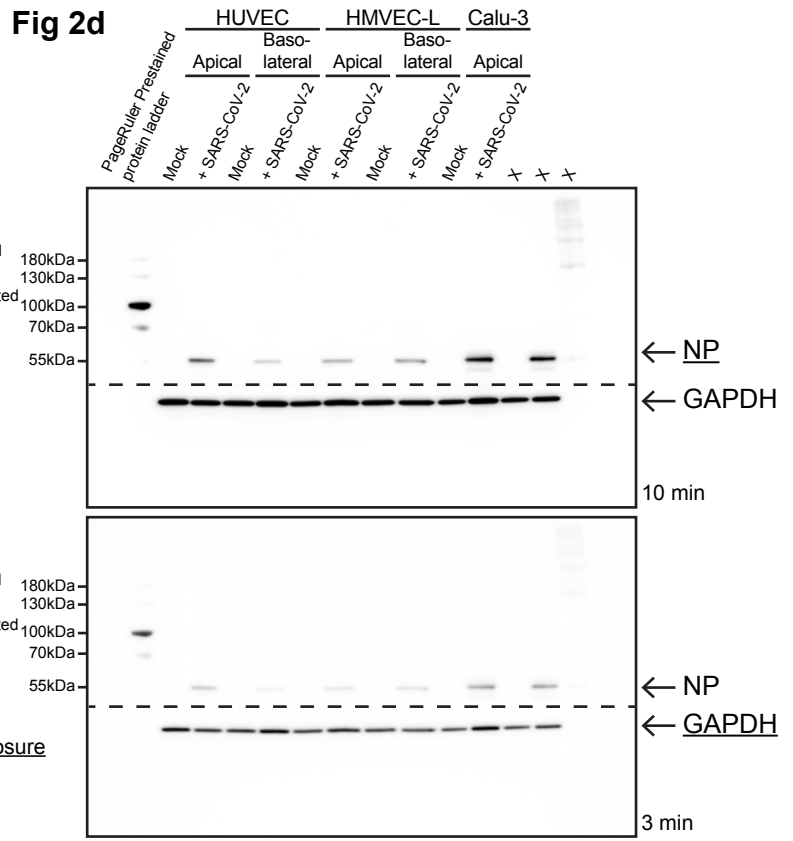

**Fig 1d**

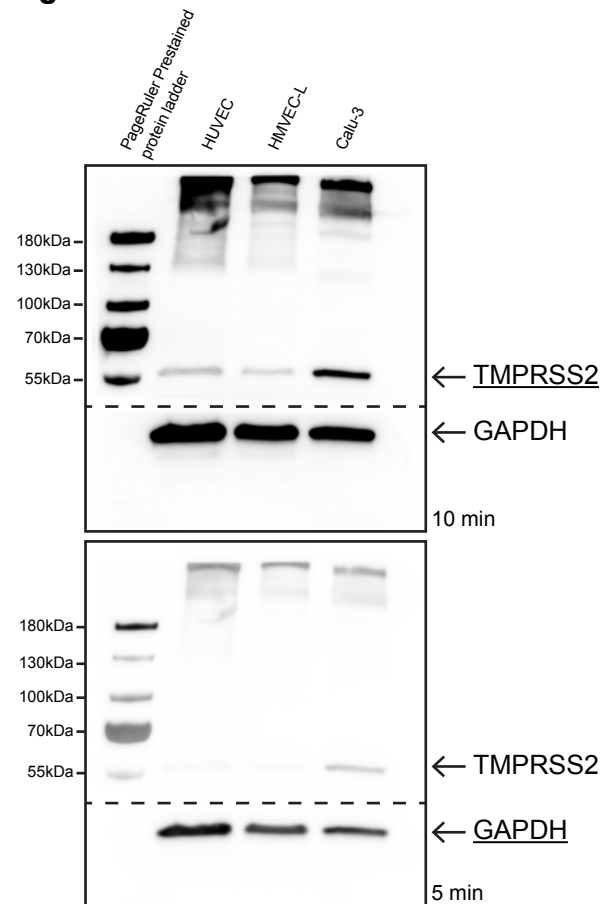

**Fig 5d**

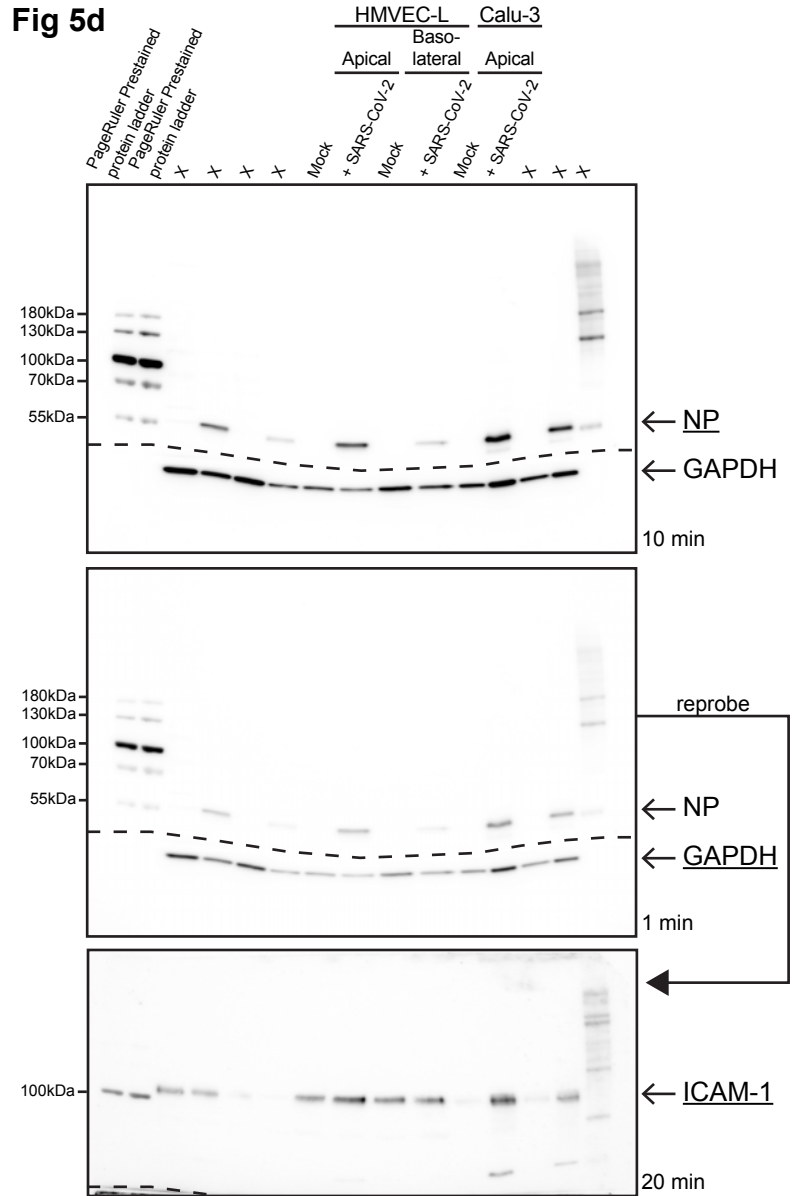

# Supplementary figure 6

## S Fig 2h

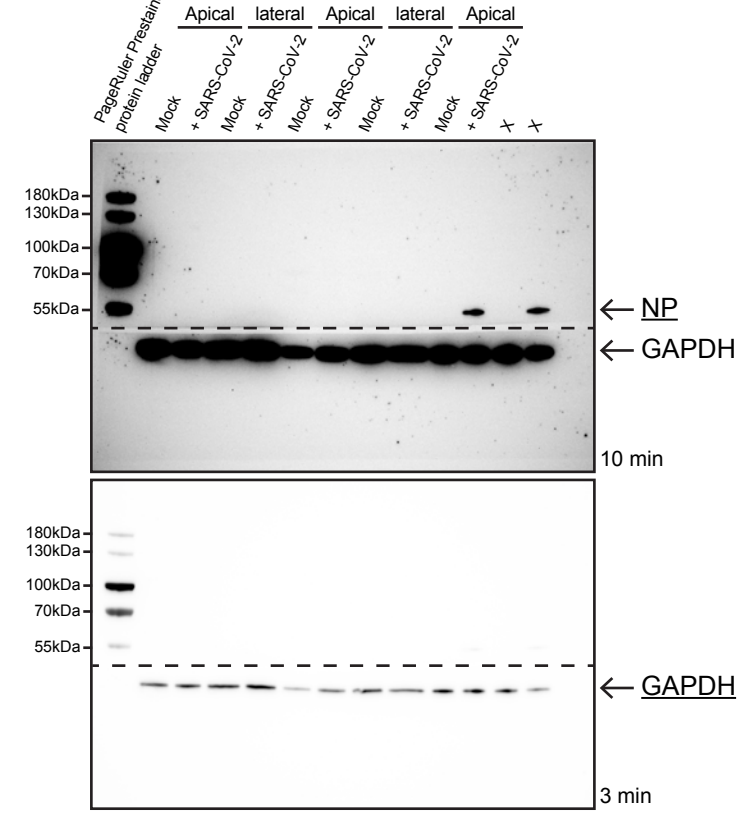

## S Fig 3b

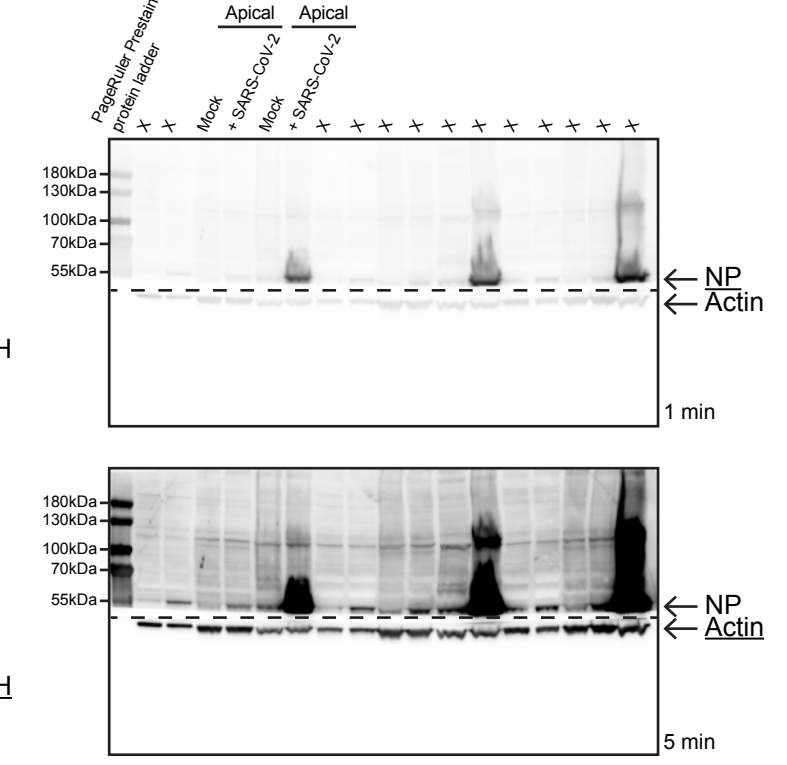

**Supplementary figure 6. Full scans of Western blots.** Full scans of Western blots shown in the paper figures. Used lanes are labelled as in the corresponding figure, with other lanes labelled as X. Dashed line indicates where membrane was cut. Underlined proteins indicate which blot was used in the corresponding figure and time indicates exposure time.
